# Supplementary material for: Prognostic Relevance of Weight and Weight Loss during Multimodal Therapy for Oesophagogastric Tumours
Source: MDPI journal article supplement (doi:10.3390/curroncol29040221), 2022-04-12
Supplement: s1 [file s1]

# Supplements

**Table S1.** Patients' characteristics for male population only.

| <b>Variable<br/>n = 108</b> | <b>Median</b>          | <b>Range</b>                  |
|-----------------------------|------------------------|-------------------------------|
| Age                         | 64                     | 29-83                         |
| Weight                      | 84 kg                  | 55-118 kg                     |
| BMI                         | 25.8 kg/m <sup>2</sup> | 16.5 – 39.4 kg/m <sup>2</sup> |
|                             | Frequency              | Percentage                    |
| Sex                         |                        |                               |
| Males                       | 108                    | 100%                          |
| Localisation                |                        |                               |
| Oesophagus                  | 65                     | 60.2%                         |
| Stomach (incl. AEG III)     | 43                     | 39.8%                         |
| Histology                   |                        |                               |
| Adenocarcinoma              | 108                    | 100%                          |
| Laurén Histology            |                        |                               |
| Intestinal Type             | 52                     | 48%                           |
| Diffuse Type                | 28                     | 25.9%                         |
| Mixed Type                  | 9                      | 8.3%                          |
| Not specified               | 19                     | 17.6%                         |
| WHO-Histology               |                        |                               |
| Papillary                   | 5                      | 4.6%                          |
| Mucinous                    | 6                      | 5.6%                          |
| Tubular                     | 24                     | 22.2%                         |
| Signet Ring Cell            | 27                     | 25%                           |
| Undifferentiated            | 8                      | 7.4%                          |
| Not specified               | 38                     | 35.2%                         |

**Table S2.** Characteristics of neoadjuvant and adjuvant chemotherapy for male population only. Sum of percentages could be ≠100% because of rounding error.

| <b>Chemotherapy performed</b>      | <b>Frequency</b> | <b>Percentage</b> |
|------------------------------------|------------------|-------------------|
| Neoadjuvant                        | 128              | 100%              |
| Adjuvant                           | 70               | 64.8%             |
| <b>Nr. of cycles (neoadjuvant)</b> |                  |                   |
| ≤2                                 | 8                | 7.4%              |
| 3-4                                | 98               | 90.7%             |
| ≥5                                 | 2                | 1.9%              |
| <b>Nr. of cycles (adjuvant)</b>    |                  |                   |
| none                               | 38               | 35.2%             |
| ≤2                                 | 16               | 14.9%             |
| ≥3                                 | 54               | 50%               |

**Table S3.** List of the most used chemotherapy regimens, for male population only. Sum of percentages could be ≠100% because of rounding error.

| Regimens <sup>1</sup>       | Frequency | Percentage |
|-----------------------------|-----------|------------|
| <b>Neoadjuvant (n= 128)</b> |           |            |
| DCX                         | 47        | 43.5%      |
| ECF                         | 34        | 31.5%      |
| FLOT                        | 18        | 16.7%      |
| FLOT-like                   | 5         | 4.6%       |
| ECF-like                    | 4         | 3.7%       |
| <b>Adjuvant (n= 81)</b>     |           |            |
| DCX                         | 35        | 50%        |
| ECF                         | 16        | 22.9%      |
| FLOT                        | 9         | 12.9%      |
| FLOT-Like                   | 6         | 8.5%       |
| ECF-Like                    | 3         | 4.3%       |
| Others                      | 1         | 1.4%       |

<sup>1</sup> DCX = Docetaxel, Cisplatin, Capecitabin; ECF = Epirubicin, Cisplatin, 5-FU; FLOT = 5-FU, Leukovorin, Oxaliplatin, Docetaxel, FLOT-Like: FLO = 5-FU, Leukovorin, Oxaliplatin; 5-FU ± Trastuzumab ± Pertuzumab; FOLFOX = 5-FU, Leukovorin, Oxaliplatin; ECF-Like: ECX = Epirubicin, Cisplatin, Capecitabin, EOF = Epirubicin, Oxaliplatin, EOX = Epirubicin, Oxaliplatin, Capecitabin; Others: Pembrolizumab.

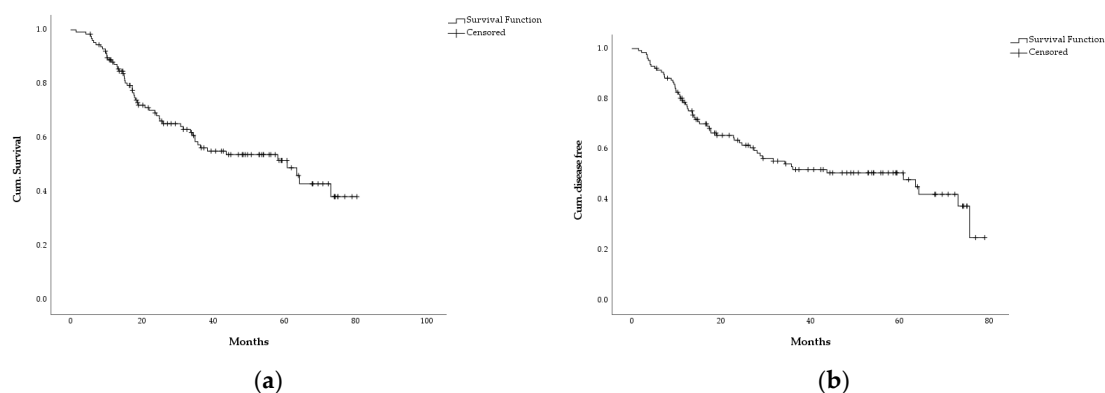

**Figure S1.** Kaplan-Meier curves in the whole cohort. (a) Overall Survival (n=128); (b) Disease-Free Survival (n=128).

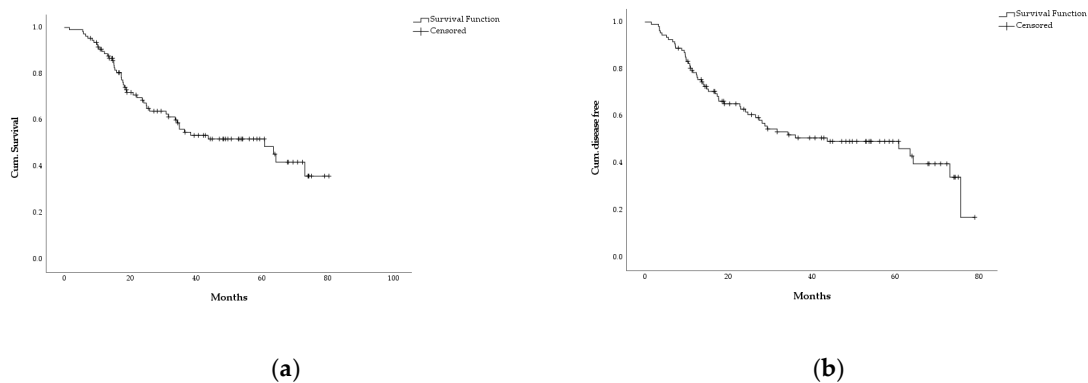

**Figure S2.** Kaplan-Meier curves for male population only. (a) Overall Survival (n=108; 60.8 months; 95%-CI: 36.7 – 84.9); (b) Disease-Free Survival (n=108; 43.7 months, 95%-CI: 15.4 – 71.9).

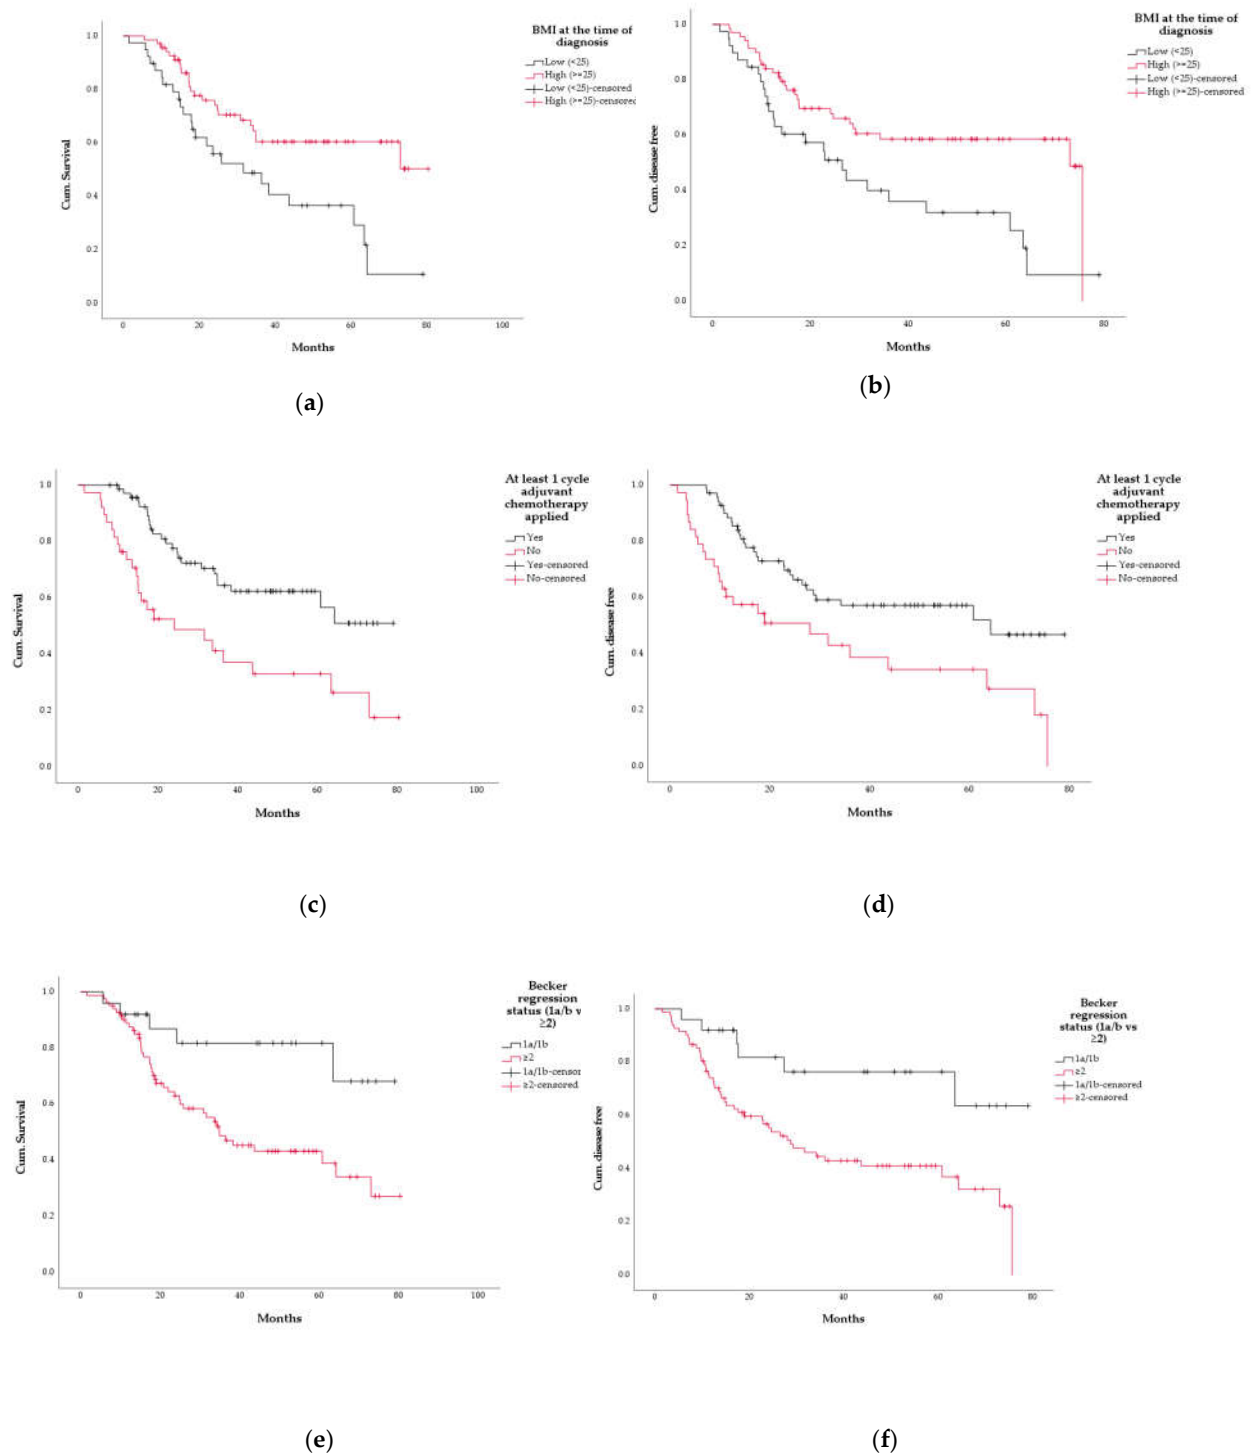

**Figure S3.** Kaplan-Meier curves for man population only according to different variables, as listed: **(a)** Overall Survival according to BMI (red line: BMI  $\geq 25$  kg/m<sup>2</sup>; n= 69; not reached; black line: BMI  $\geq 25$  kg/m<sup>2</sup>; n= 39; 31.7 months, 95%-CI: 12 – 51.3; p= 0.005); **(b)** Disease-Free Survival according to BMI (red line: BMI  $\geq 25$  kg/m<sup>2</sup>, n= 69; 73 months; 95%-CI 58.7 – 87.4; black line: BMI  $\geq 25$  kg/m<sup>2</sup>, n= 39; 26.5 months; 95%-CI: 16.2 – 36.8; p= 0.006); **(c)** Overall Survival according to application of adjuvant chemotherapy (black line: at least 1 cycle, n= 70; not reached; red line: no adjuvant chemotherapy, n= 38; 24.1 months; 95%-CI: 1.6 – 46.7; p= 0.000); **(d)** Disease-Free Survival according to application of adjuvant chemotherapy (black line:

at least 1 cycle, n= 70; not reached; red line: no adjuvant chemotherapy, n= 38; 11.3 months, 95%-CI: 5.8 – 50.3; p= 0.004); (e) Overall Survival according to Becker regression status, 107 analysable pts (black line: Becker regression status 1a/1b, n= 25; not reached; red line: Becker regression status  $\geq 2$ , n= 82; 34.9 months, 95%-CI: 23.2 – 46.7; p= 0.01); (f) Disease-Free Survival according to Becker regression status, 107 analysable pts (black line: Becker regression status 1a/1b, n= 25; not reached; red line: Becker regression status  $\geq 2$ , n= 82; 5.5 months; 95%-CI: 17.9 – 39.6; p= 0.005).

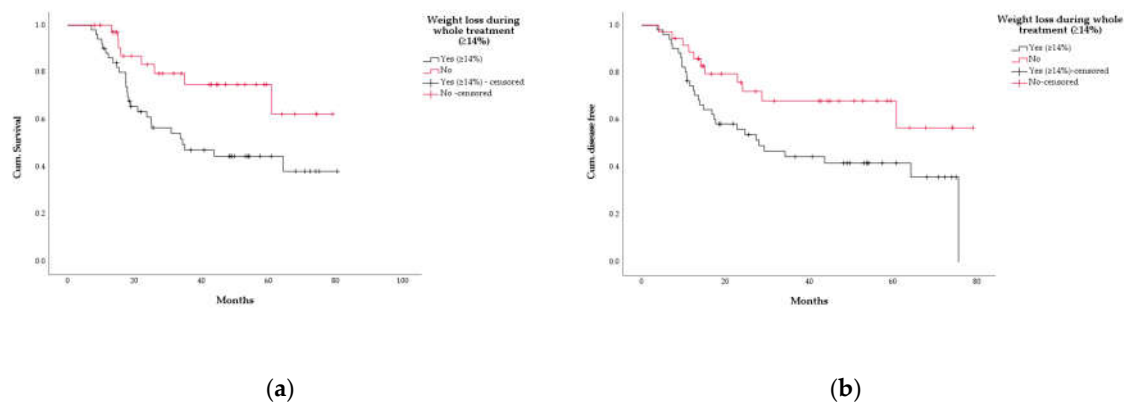

**Figure S4.** Kaplan-Meier curves for male population only according to weight loss during the whole treatment (threshold: WL  $\geq 14\%$ , 87 analysable pts). (a) Overall Survival (black line: WL  $\geq 14\%$ , n= 51; 34.3 months, 95%-CI: 12 – 56.6; red line: WL  $< 14\%$ , n= 36; not reached; p= 0.017); (b) Disease-Free Survival (black line: WL  $\geq 14\%$ , n= 51; 28 months; 95%-CI: 14 – 42.1; red line: WL  $< 14\%$ , n= 36; not reached; p= 0.027).

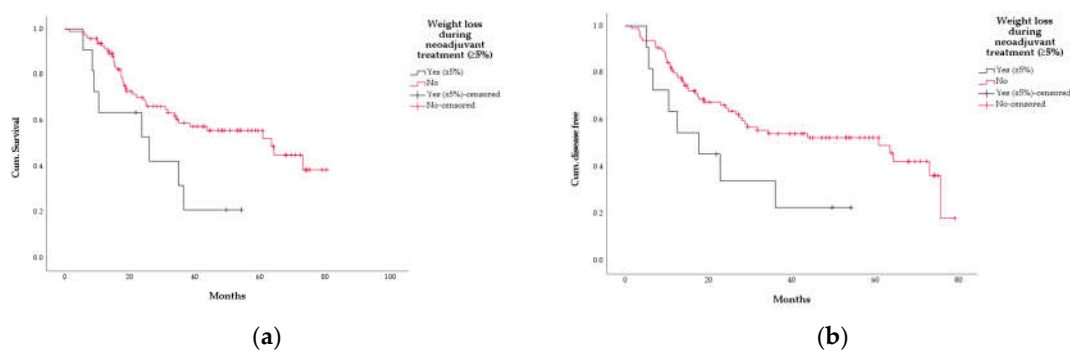

**Figure S5.** Kaplan-Meier curves for male population only according to weight loss during neoadjuvant therapy (threshold: WL  $\geq 5\%$ , 108 analysable pts). (a) Overall Survival (black line: WL  $\geq 5\%$ , n= 11; 25.9 months; 95%-CI: 3.6 – 48.2; red line: WL  $< 5\%$ , n= 97; 63.5 months; 95%-CI: 40.8 – 86.2; p= 0.028); (b) Disease-Free Survival (black line: WL  $\geq 5\%$ , n= 11; 17.7 months; 95%-CI: 5.4 – 30; red line: WL  $< 5\%$ , n= 97; 60.8 months; 95%-CI: 31.3 – 90.3; p= 0.039).
